# Supplementary material
Source: MDPI journal article supplement (https://www.mdpi.com/2079-6412/13/2/407)
Supplement: s1 [file s1 › coatings-2200703-supplementary.pdf]

# Preparation and Heat Dissipation Performance of Vertical Graphene Nanosheets/Carbon Fibers Composite Film

Mengting Yan <sup>1,2</sup>, Weihong Jia <sup>2,\*</sup>, Yawen Yang <sup>2</sup>, Qi Zhou <sup>1,\*</sup>, Limin Ma <sup>2</sup> and Jinqing Wang <sup>2,3</sup>

<sup>1</sup> School of Materials Science and Engineering, Lanzhou University of Technology, Lanzhou 730050, China

<sup>2</sup> State Key Laboratory of Solid Lubrication, Lanzhou Institute of Chemical Physics, Chinese Academy of Sciences, Lanzhou 730000, China

<sup>3</sup> Center of Materials Science and Optoelectronics Engineering, University of Chinese Academy of Sciences, Beijing 100049, China

\* Correspondence: whjia@licp.cas.cn (W.J.); zhousq@lut.edu.cn (Q.Z.); Tel.: +0086-931-4968046 (W.J.);

Fax: +0086-931-4968019

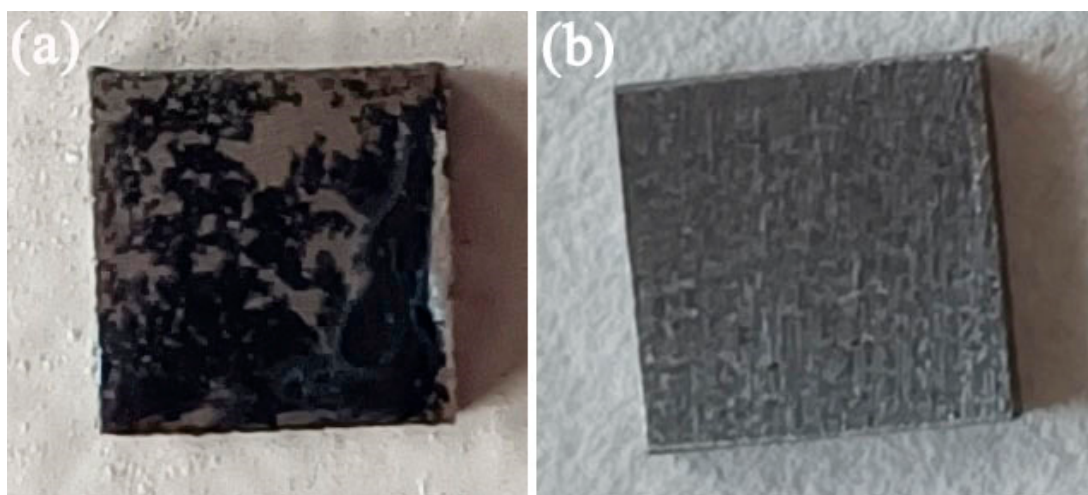

**Figure S1.** Optical photographs of VGNs/CF films on RSS surfaces prepared by (a) spin-coating (b) spraying techniques.

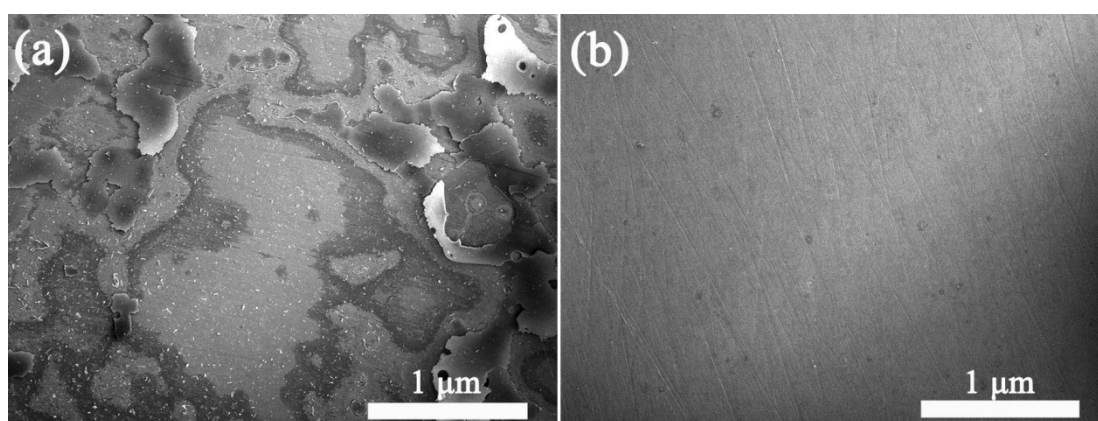

**Figure S2.** Comparison of SEM images after heating films prepared by (a) spin-coating and (b) spraying techniques.

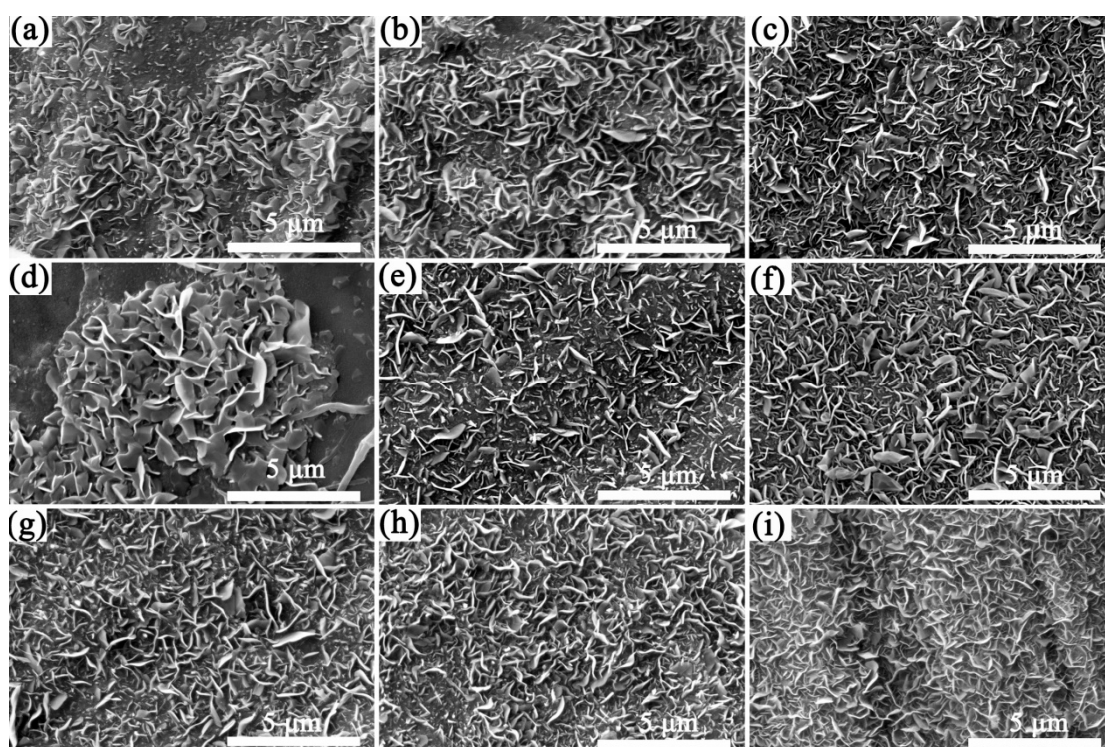

**Figure S3.** SEM images of VGNs/CF composite films on RSS surfaces grown at 850°C for 3 h using different concentrations and dosages of precursor solutions: (a) 0.4 g/mL, 0.6 mL; (b) 0.4 g/mL, 0.8 mL; (c) 0.4 g/mL, 1.0 mL; (d) 0.6 g/mL, 0.6 mL; (e) 0.6 g/mL, 0.8 mL; (f) 0.6 g/mL, 1.0 mL; (g) 0.8 g/mL, 0.6 mL; (h) 0.8 g/mL, 0.8 mL; (i) 0.8 g/mL, 1.0 mL.

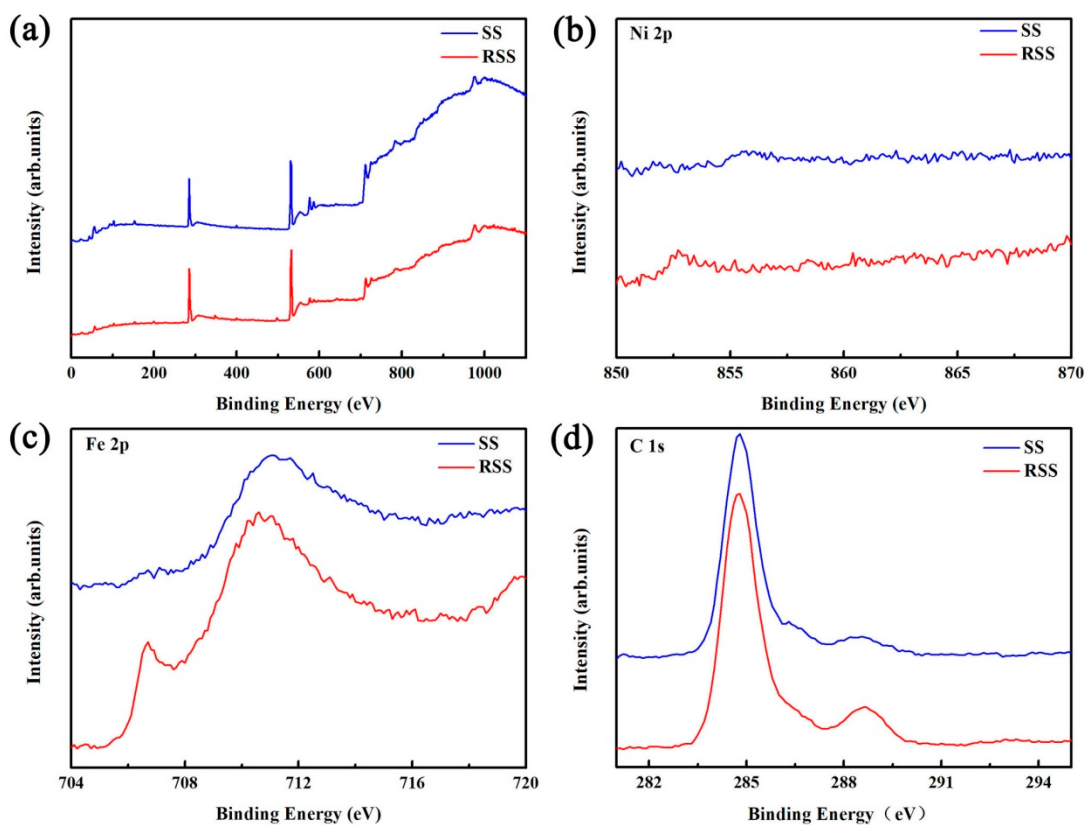

**Figure S4.** XPS images of stainless steel (SS) substrate before and after roughening treatment.

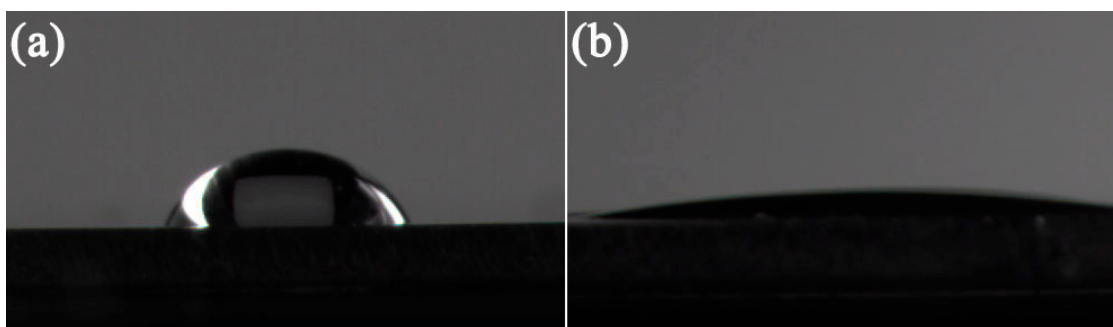

**Figure S5.** Wettability comparison of water droplet on RSS substrate surface (a) before and (b) after oxygen plasma pretreatment.

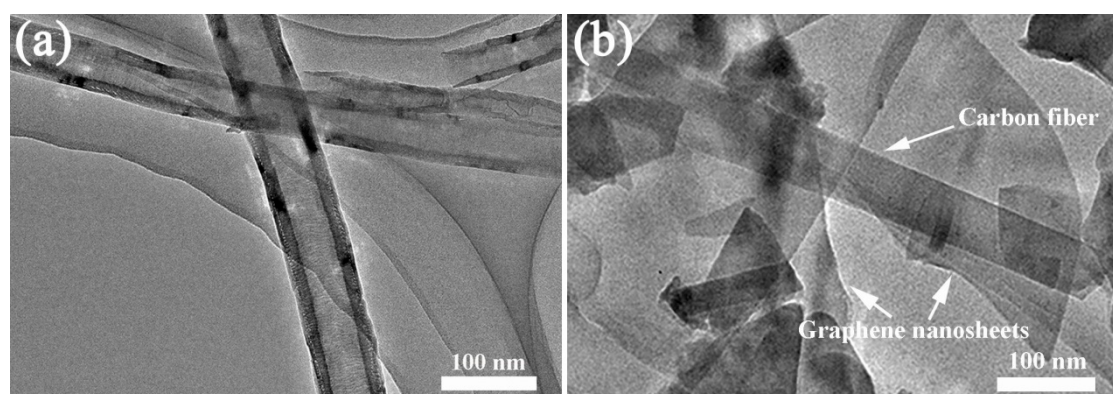

**Figure S6.** TEM images of (a) the CF and (b) the CF in VGNs/CF composite film.
